# Supplementary material for: Oxygen vacancies coupled with surface silicide facilitate CO2 activation at near-room temperature for efficient methane productivity on Ni-oxide supported Pd nanoparticles
Source: Royal Society of Chemistry journal article supplement (doi:10.1039/d4se00482e), 2024-01-01
Supplement: d4se00482e1.pdf [file d4se00482e1.pdf]

## Supplementary Information for

### **Oxygen Vacancies Coupled with Surface Silicide Facilitate the CO<sub>2</sub> Activation at Near-Room Temperature for Efficient Methane Productivity on Ni-Oxide Supported Pd Nanoparticles**

Thomas Yang,<sup>1‡</sup> Amisha Beniwal,<sup>1‡</sup> Dinesh Bhalothia,<sup>1\*</sup> Che Yan,<sup>1</sup> Chia-Hsin Wang,<sup>2</sup> and Tsan-Yao

Chen, <sup>1\*</sup>

#### Affiliations:

<sup>1</sup> Department of Engineering and System Science, National Tsing Hua University, Hsinchu 30013, Taiwan

<sup>2</sup> National Synchrotron Radiation Research Center, Hsinchu 30076, Taiwan

‡ denotes the equal contribution of authors.

#### Corresponding Author(s):

Tsan-Yao Chen

Email: [chencanaeser@gmail.com](mailto:chencanaeser@gmail.com)

Tel: +886-3-5715131 # 34271

FAX: +885-3-5720724

Dinesh Bhalothia

Email: [fortuner2014@gmail.com](mailto:fortuner2014@gmail.com)

## 1. Transmission electron microscopy inspection of control samples.

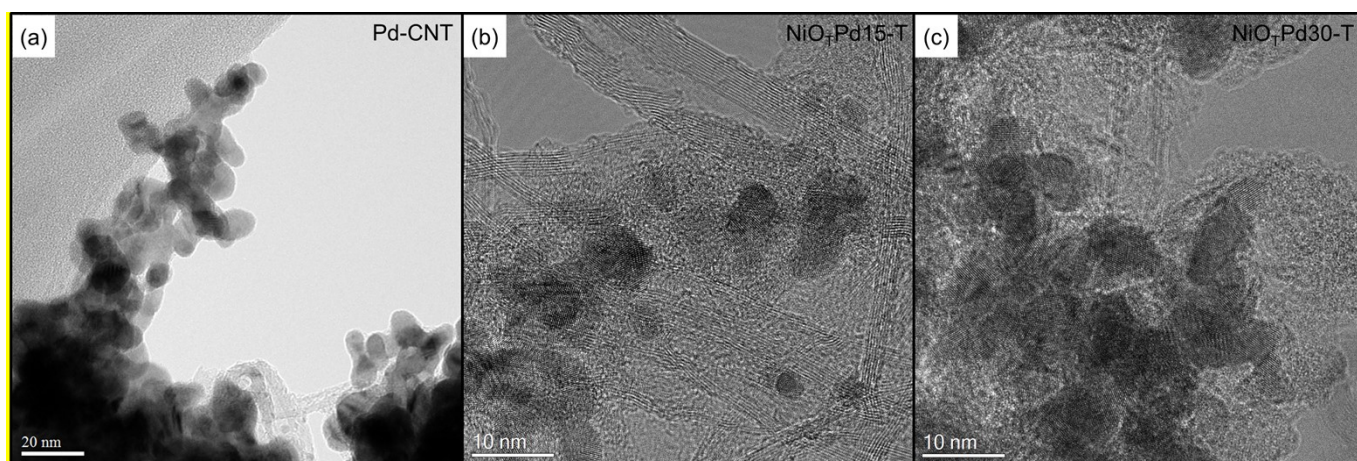

**Figure S1.** Low-resolution HRTEM images of (a) as-prepared Pd-CNT, (b) NiO<sub>7</sub>Pd15-T and (c) NiO<sub>7</sub>Pd30-T NCs.

## 2. X-ray diffraction analysis on the experimental samples

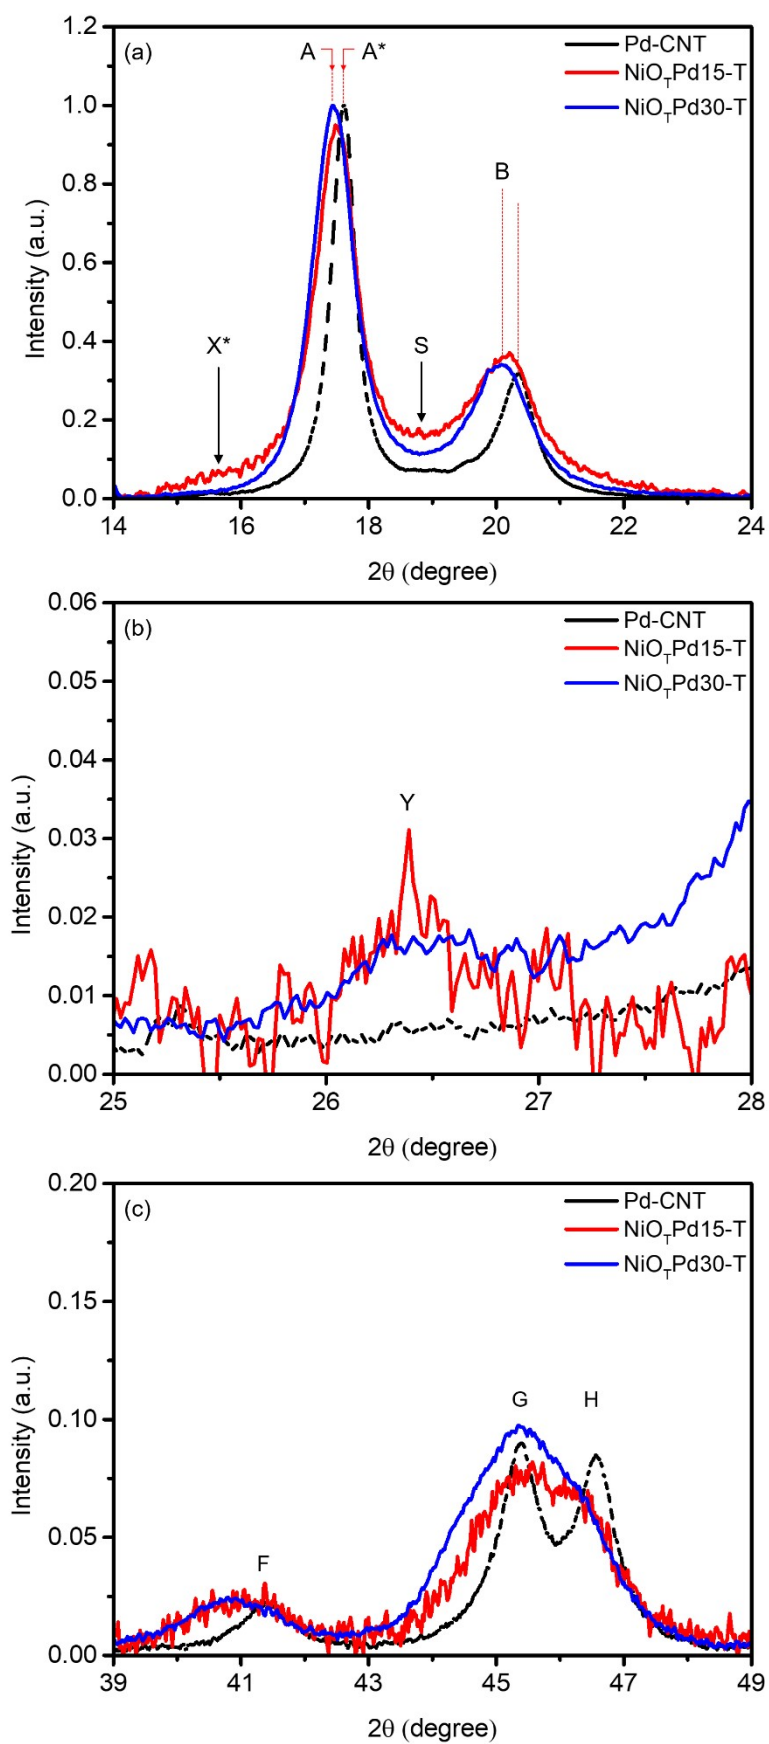

**Figure S2.** The zoom in regions of (i), (ii) and 39° – 49° for the diffraction patterns in Figure 2.

**Table S1.** The d-spacing and intensity ratio of the diffraction peak from (111) to (hkl) facets for the experimental samples (NiO<sub>T</sub>Pd15-T and NiO<sub>T</sub>Pd30-T) and reference sample (Pd-T).

| Facets | Lattice space (Å) |                         |                         | H(111)/H(hkl) |                         |                         | Delta d vs. Pd-CNT (%) |          |
|--------|-------------------|-------------------------|-------------------------|---------------|-------------------------|-------------------------|------------------------|----------|
|        | Pd-CNT            | NiO <sub>T</sub> Pd15-T | NiO <sub>T</sub> Pd30-T | Pd-CNT        | NiO <sub>T</sub> Pd15-T | NiO <sub>T</sub> Pd30-T | Δd - 15T               | Δd - 30T |
| (111)  | 2.25              | 2.265                   | 2.27                    | 1             | 1                       | 1                       | 0.64                   | 0.87     |
| (200)  | 1.951             | 1.969                   | 1.977                   | 3.35          | 2.77                    | 3.04                    | 0.9                    | 1.33     |
| (220)  | 1.377             | 1.385                   | 1.39                    | 4.37          | 5.16                    | 4.69                    | 0.58                   | 0.95     |
| (311)  | 1.175             | 1.183                   | 1.187                   | 3.98          | 4.42                    | 4.31                    | 0.68                   | 1.06     |
| (222)  | 1.125             | 1.13                    | 1.136                   | 11.90         | 14.97                   | 15.70                   | 0.5                    | 0.97     |

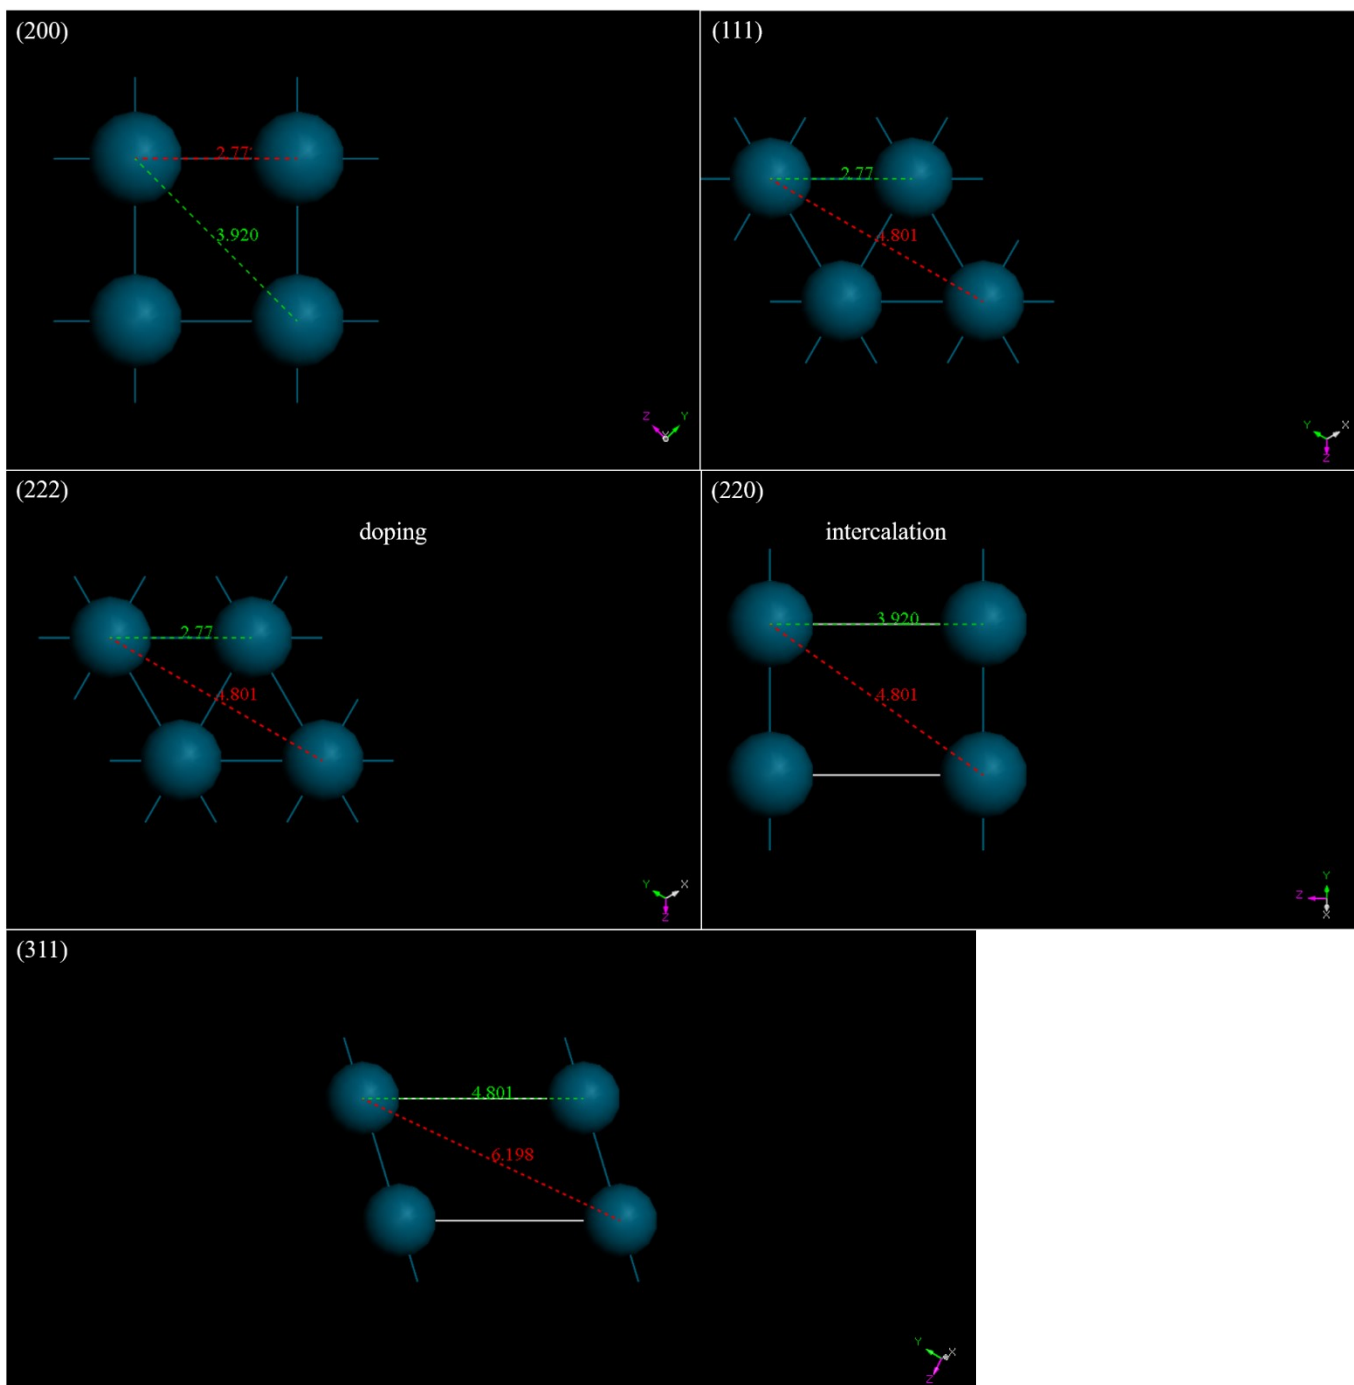

**Figure S3.** The surface atomic arrangement of (111), (200), (220), (311) and (220) facets of fcc phase Pd crystal.

### 3. X-ray absorption analysis of the Atomic structure of control samples

X-ray absorption spectroscopic analysis is employed to elucidate the local atomic structure around Pd atoms of the experimental samples. For clarifying the effects of Pd-Ni hybridization and the TMOS in Ni oxide supported Pd NCs, results of the monometallic Pd and Ni NCs with the same surface modification as that of experimental samples are compared in Figure S4. The corresponding results resemble that the local atomic structure of Pd NC is disordered by the formation of a thin Pd oxide layer in the presence of TMOS on its surface. On the other hand, the local structure symmetry around Ni atoms is improved by the same treatment on NiO<sub>T</sub>-T. These characteristics reveal the selectivity of metallic Pd atom is higher than that of Ni to the TMOS molecule.

In **Figure S4a**, with the same position of inflection point (X) as that of Pd powder (**Figure S4a**, inset), the Pd atoms in Pd-CNT and Pd-T preserve a metallic state. Consequently, compared with that of Pd powder, the lifting of valley V with the suppression of absorption peak height ( $H_N$ ) and the narrowing of the width between the two-absorption peaks ( $W_{MN}$ ) can be attributed to the oxygen adsorption on the surface atoms of the Pd-CNT. In terms of Pd-T, compared to that of Pd-CNT, the further suppression of  $H_N$  with narrowing of  $W_{MN}$  is due to the formation of a thin Pd oxide layer on the NC surface and is consistently revealed by the substantially suppressed radial peak B ( $\Delta H_B$ ) in **Figure S4b** corresponding to a decrement of coordination number for Pd-Pd bond pairs ( $CN_{Pd-Pd}$ ) by 1.53 (i.e, 20.5%).

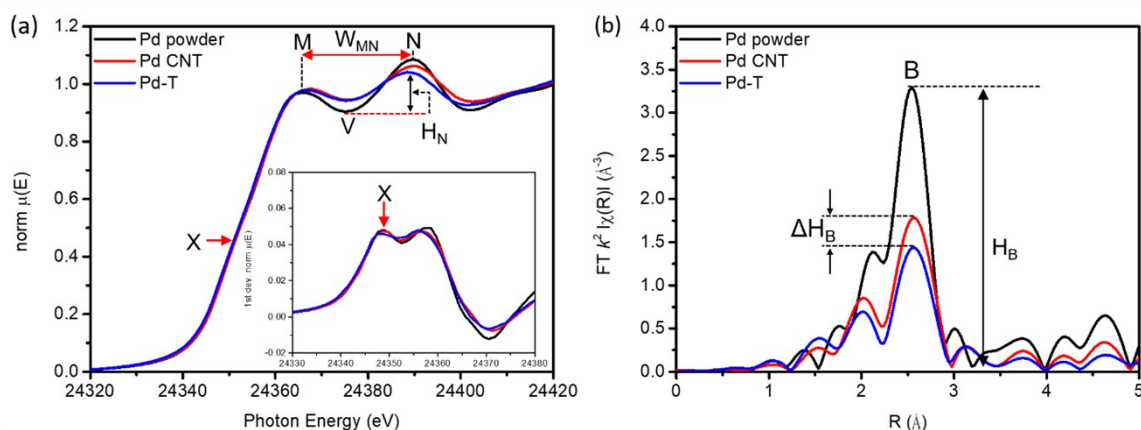

**Figure S4.** (a) The X-ray absorption near edge structure (XANES) spectra and (b) the corresponding Fourier transformed extended X-ray absorption fine structure (EXAFS) spectra of standard Pd powder, Pd-CNT and Pd-T NCs at Pd K-edge.

The XANES spectra of monometallic Ni oxides (i.e., NiO<sub>T</sub> and NiO<sub>T-T</sub>) and Ni foil are demonstrated in **Figure S5a**. As shown, with the same inflection point (X) to that of NiO<sub>T</sub>, the same profile in both near-edge peak (C) and deviation curve (inset) suggest that the chemical state of Ni atoms remains unchanged by interacting with TMOS in NiO<sub>T-T</sub>. Meanwhile, as compared to that of NiO<sub>T</sub>, the suppression of background intensity with an increased height (H<sub>X</sub>) to width (W<sub>X</sub>) ratio of the pre-edge peak (**Figure S5b**) suggests the improvement of local symmetry around Ni atoms in NiO<sub>T-T</sub>. **Figure S5c** demonstrates the corresponding EXAFS spectra and the quantitative atomic structure parameters from the model analysis are summarized in **Table S3**. Accordingly, compared to that of NiO<sub>T</sub>, the coordination number for the oxygen atom in the 1<sup>st</sup> atomic shell of Ni atom (CN<sub>Ni-O1</sub>) is increased by 0.5 while that of Ni and O atoms is changed respectively by 0.14 and -1.07 in the 2<sup>nd</sup> atomic shell of NiO<sub>T-T</sub>. In the absence of direct bonding to the Si atom in the first coordination shell (CN<sub>Ni-Si</sub>), the decoration is formed by the adsorption followed by hydration of TMOS into silicate on the NiO<sub>T-T</sub> surface. Such a scenario results in the Si-O-Ni bonding between silicate, therefore, suppressing the CN<sub>Ni-O2</sub> as well as the long-range ordering around Ni atoms.

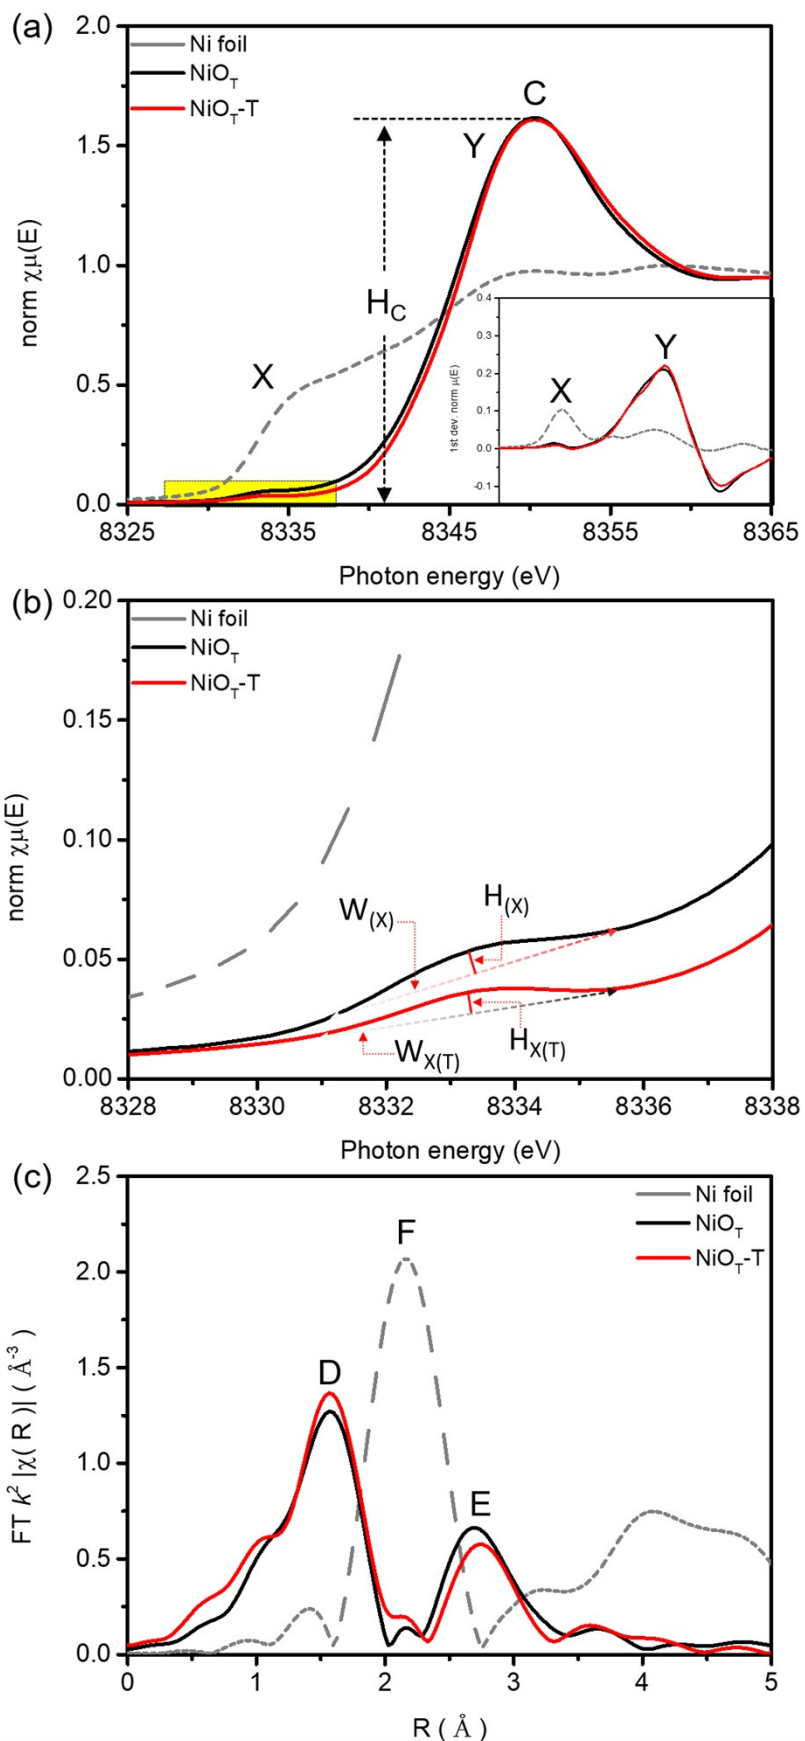

**Figure S5.** (a) The X-ray absorption near edge structure (XANES) spectra (b) the zoom-in of region X and (c) the corresponding Fourier transformed extended X-ray absorption fine structure (EXAFS) spectra of standard Ni foil, NiO<sub>T</sub> and NiO<sub>T</sub>-T NCs at Ni K-edge.



**Figure S6a** and **inset** respectively compare the Ni K-edge XANES spectra and corresponding 1<sup>st</sup> deviation curves of the NiO<sub>T</sub>Pd15-T with that of the Ni foil, NiO<sub>T</sub> and the NiO<sub>T</sub>Pd15. In a XANES spectrum, the position of the inflection point X (Y) resembles the threshold energy for the electron transition from 1s to 3d (4s/4p) orbitals and the intensity of the near-edge (H<sub>C</sub>) peak refers to the extent of 4s/4p empty state of Ni atoms. The former is proportional to the extent of the oxidation state and the latter is the index for the extent of electron transition from Ni to the neighboring atoms. For further clarification, the zoom-in of the pre-edge region is demonstrated in **Figure S7a** and corresponding parameters are summarized in **Table S2**, where the intensity to width ratio in the pre-edge region (H<sub>X</sub>/W<sub>X</sub>) is the index for the extent of orbital distortion (i.e., local atomic structure symmetry). As depicted in **Figure S6a**, compared to that of NiO<sub>T</sub>, a suppression of H<sub>C</sub> by 19.2% (from 1.61 to 1.30) with an enhancement of H<sub>X</sub>/W<sub>X</sub> by 0.05 (**Figure S7a** and **Table S2**) respectively suggest the increased electron density in the 4s/4p orbitals and the improved local atomic symmetry around the Ni atoms in NiO<sub>T</sub>Pd15. These scenarios could be rationalized by the preservation of certain metallic Ni atoms in the interface between the Pd nano-islands and the Ni oxide. Compared to the near-edge features of the NiO<sub>T</sub>Pd15, by decorating with TMOS molecule followed by the hydration reaction, a substantially enhanced H<sub>C</sub> by 26.9% (from 1.30 to 1.65), the broadening of peak C with a slight shift to high energy and the suppression of H<sub>X</sub>/W<sub>X</sub> ratio by 0.05 respectively refer to the electron relocation to the neighboring atoms, the expansion and chemical shift of 4s/4p band to high energy and the disordering of local symmetry around the Ni atoms in the NiO<sub>T</sub>Pd15-T. In addition, the presence of a shoulder in the low energy side of peak Y in the inflection curve indicates the splitting of 4s/4p orbitals and can be attributed to the formation of a strong chemical bond with Si atoms in the Pd silicide. Results of NCs with a Pd/Ni ratio of 3.0 are compared in **Figure S6b** and **Table S2**. Compared to that of NiO<sub>T</sub>Pd15, with the same position of X, a substantially increased H<sub>C</sub> by 0.22 (16.7%) and lower H<sub>X</sub>/W<sub>X</sub> ratio indicate a higher extent of electron relocation and lower extent of local atomic structure symmetry from Ni to the neighboring atoms in the NiO<sub>T</sub>Pd30 (**Figure S7b**). Such a scenario seemingly controversial to higher coverage of Pd nano-island on the Ni oxide (**Figure S1**), however, consistently rationalizes the results of XRD analysis in which a high content of galvanic replacement between Pd<sup>2+</sup> ions

and Ni atoms followed by the co-precipitation of Ni and Pd atoms into Pd-riched crystal and the subsequent oxidation of Ni atoms in its surface. Consequently, with a higher surface exposure of Ni atoms to that of NiO<sub>T</sub>Pd15, a higher extent of Ni oxidation with a lower local atomic symmetry to oxygen atoms (shown by the suppressed H<sub>X</sub>/W<sub>X</sub>). For NiO<sub>T</sub>Pd30-T, compared to the spectroscopic feature of NiO<sub>T</sub>Pd30, a higher H<sub>C</sub> and splitting of deviation peak (depicted by a weak shoulder on the low energy side of peak Y) with a pronounced intensity respectively denote the further oxidation of Ni atoms and formation of Pd silicide.

For a detailed inspection of the atomic structure and local symmetry, the FT-EXAFS curves for NCs with Pd/Ni ratios of 1.5 and 3.0 are, respectively, demonstrated in **Figure S6c** and **Figure S6d**; where the radial peaks D and E are contributions of the X-ray interferences respectively to the atomic bond pairs to O atom in the 1<sup>st</sup> coordination shell (Ni-O1) as well as the Ni and O atoms in the 2<sup>nd</sup> coordination shell (Ni-Ni2 and Ni-O2). Meanwhile, the atomic structure parameters of all samples from the model analysis are compared in **Table S3**. As depicted in **Figure S6c**, compared to that of NiO<sub>T</sub>, the upshift of peak D to D\* indicates the elongation of Ni-O1 distance by 0.09 Å, therefore, increasing the local space for the relaxation of neighboring atoms (oxygen and Ni) around the Ni atoms in NiO<sub>T</sub>Pd15. Such a scenario is attributed to the intercalation of Pd atoms which induces a certain extent of oxygen defects and is elucidated by suppression of CN<sub>Ni-O1</sub> by 1.34 to 3.44 (**Table S3**) in the first coordination shell around the Ni atoms in the Ni oxide. Competition of reaction kinetics for the galvanic replacement to that of the heterogeneous nucleation and crystal growth of Pd nano-island could be a potential rationale. With a low content of Pd<sup>2+</sup> ions, the reaction kinetics of galvanic replacement to Ni atoms in the Ni oxide is suppressed and thus results in a limited amount of residual Ni<sup>2+</sup> ions (Ni<sup>2+R</sup>) in the reaction system. Consequently, the steric configuration and composition of the Pd nano-island is dominated by the crystal growth pathway in which a low content of Ni atoms (by interacting Ni<sup>2+R</sup> with the reduction agent) is intercalated in its surface upon the coprecipitation with the Pd atoms. These hypotheses are further rationalized by the formation of short-range ordered (long-range disordered) Ni oxide illustrated by the substantial suppression on the peak E and the presence of shoulder F\* in the FT-EXAFS curve. The former corresponds to the absence of CN<sub>Ni-O2</sub> in the 2<sup>nd</sup> atomic shell. The latter is the contribution of Ni-O and metallic Ni-Ni bond pairs respectively with

a CN of 1.40 and 0.78 at 2.435 and 2.522 Å in the 1<sup>st</sup> coordination shell of the Ni atoms. Hereby, a slight Ni intermix of 6.5% around Pd atoms with the absence of Pd around Ni atoms (**Table S3**) and the retention of metallic Ni atom rationalize that the NiO<sub>T</sub>Pd15 NC is composed of sub-nanometer metallic Ni clusters in the interface between the Pd nano-islands and long-range disordered Ni oxide. In which, the Ni atoms are coordinated to oxygen atoms in the tetrahedral symmetry sites with certain extent of oxygen defects. Adsorption of TMOS followed by its hydration reaction with water molecules restructures the atomic arrangement in the NiO<sub>T</sub>Pd15-T surface. As shown in **Figure S6c**, compared to that of NiO<sub>T</sub>Pd15, the offset of peak D\* to a lower radial position with an enhanced intensity respectively indicate the compression of bond length by 0.099 Å and with the increment of CN<sub>Ni-O1</sub> by 2.08. Meanwhile, compared to that of NiO<sub>T</sub>, a slightly enhanced radial peak \* is the contribution of Ni-Si bond pair with a CN<sub>Ni-Si</sub> of 0.69 at 2.465 Å and is complimentary evidence with the splitting of 1<sup>st</sup> deviation curve in **Figure S6a** inset for the formation of NiPd<sub>3</sub> alloy in the NiO<sub>T</sub>Pd15-T. In this event, compared to that of NiO<sub>T</sub>Pd15, the pronounced radial peak E is the contribution of the Ni-O and Ni-Ni bond pairs with the coordination numbers of 2.14 and 2.97, respectively. Since the number of oxygen atoms (CN<sub>Ni-O2</sub>) is higher than that of the Ni atoms in the 2<sup>nd</sup> coordination shell (CN<sub>Ni-Ni2</sub>) in a Ni oxide, such a result is controversial however can be rationalized by the formation of NiPd oxide by the adsorption of TMOS molecules accompanied with the hydration reaction in the metallic Ni atoms. Therefore, compared with that of NC without TMOS decoration (i.e., NiO<sub>T</sub>Pd15), a reduced CN<sub>Ni-O2</sub> by 0.83 could be rationalized by co-sharing of oxygen between the Si and Ni atoms (i.e., Si-O-Ni bond) alloying with metallic Ni atoms in the NiO<sub>T</sub>Pd15-T. The same pathways hold in all samples with the TMOS decoration. Meanwhile, compared to that of Pd atoms, a substantially reduced heteroatomic intermix of Si to Ni atoms suggests the truth for the retention of low contents of metallic Ni atoms in the NiO<sub>T</sub>Pd15. For the case of NiO<sub>T</sub>Pd30, compared to that of NiO<sub>T</sub>, the suppressed CN in all coordination shells suggest the formation of oxygen defects around Ni atoms by the intercalation of Pd atoms and the growth of Pd riched NiPd nano-island in the Ni oxide surface. Meanwhile, as illustrated by the CN<sub>Ni-Ni1</sub>, the metallic Ni atoms in the Pd to Ni oxide interface are absent. Consequently, in the NiO<sub>T</sub>Pd30-T, the NiPdO<sub>3</sub> is formed by the interaction of TMOS molecules with the retained Ni atoms in the Pd nano-island

and the oxygen defects in the Ni oxide of the NiO<sub>T</sub>Pd30. Since the content of metallic Ni atoms in Pd nano-island and the oxygen defect in Ni oxide is low as compared to that of NiO<sub>T</sub>15Pd-T, the suppression of NiPdO<sub>3</sub> is expectable. For clarification in detail, corresponding model analysis fitting curves of the above NCs are compared with their experimental spectra at Ni and Pd K-edges in **Figure S8**.

The Wavelet transformed EXAFS (WT-EXAFS) pattern of NiO<sub>T</sub>, NiO<sub>T</sub>Pd15, NiO<sub>T</sub>Pd15-T, NiO<sub>T</sub>-T, NiO<sub>T</sub>Pd30 and NiO<sub>T</sub>Pd30-T are demonstrated in **Figures S6e to S6j**. The distribution of WT EXAFS pattern in radial and the wavenumber axes correspond respectively to the dispersion of the interatomic distance and the extent of electronic interaction from Ni to the neighboring atoms; where the profiles of the histogram in regions A and B are X-ray interferences between center and the atoms 1<sup>st</sup> and 2<sup>nd</sup> nearest coordination shell. As indicated in **Figure S6e**, the extension of the histogram ranging from 1.5 to 2.5 Å consistently reveals the coexistence of the metallic Ni (Ni-Ni) and Ni oxides (Ni-O) bond pairs. Meanwhile, the considerable extent of backscattering intensity with the splitting of pattern in three lines till 5 Å resembles the presence of long-range ordered atomic structure in NiO<sub>T</sub>. For NiO<sub>T</sub>Pd15 (**Figure S6f**), compared to that of NiO<sub>T</sub>, the changes of WT pattern in spherical symmetry (denoted by the black arrow) at 1.9 to 2.0 Å and the suppression of the backscattering intensity with narrowing  $W_X$  and merging of pattern in region B reveals the formation of short-range ordered local around Ni atoms. By capping silicide on NiO<sub>T</sub>Pd15-T surface, the extension and enhancement of the WT pattern elucidate the improvement of local structure ordering around N atoms in Ni oxide (**Figure S6g**). The hybridization between Si and Ni atoms is confirmed by the changes of WT pattern symmetry from line dispersion in NiO<sub>T</sub> to the droplet like dispersion in NiO<sub>T</sub>-T (**Figure S6h**). Such an evolution reveals the difference of the electron relocation manners between the Ni-Si and Ni-O bond pairs due to the electronegativity and electronic configuration of Si and O atoms. Compared with that of NiO<sub>T</sub>Pd15 and NiO<sub>T</sub>Pd15-T, the substantially enhanced intensity and expanded  $W_X$  are found both in the NiO<sub>T</sub>Pd30 (**Figure S6i**) and NiO<sub>T</sub>Pd30-T (**Figure S6j**). Such a scenario indicates the stronger electron localization around Ni atoms (i.e., the lower extent of heteroatomic hybridization to the neighboring Si and O atoms) due to the higher extent of steric protection with thicker Pd nano-islands in the Ni oxide surface.

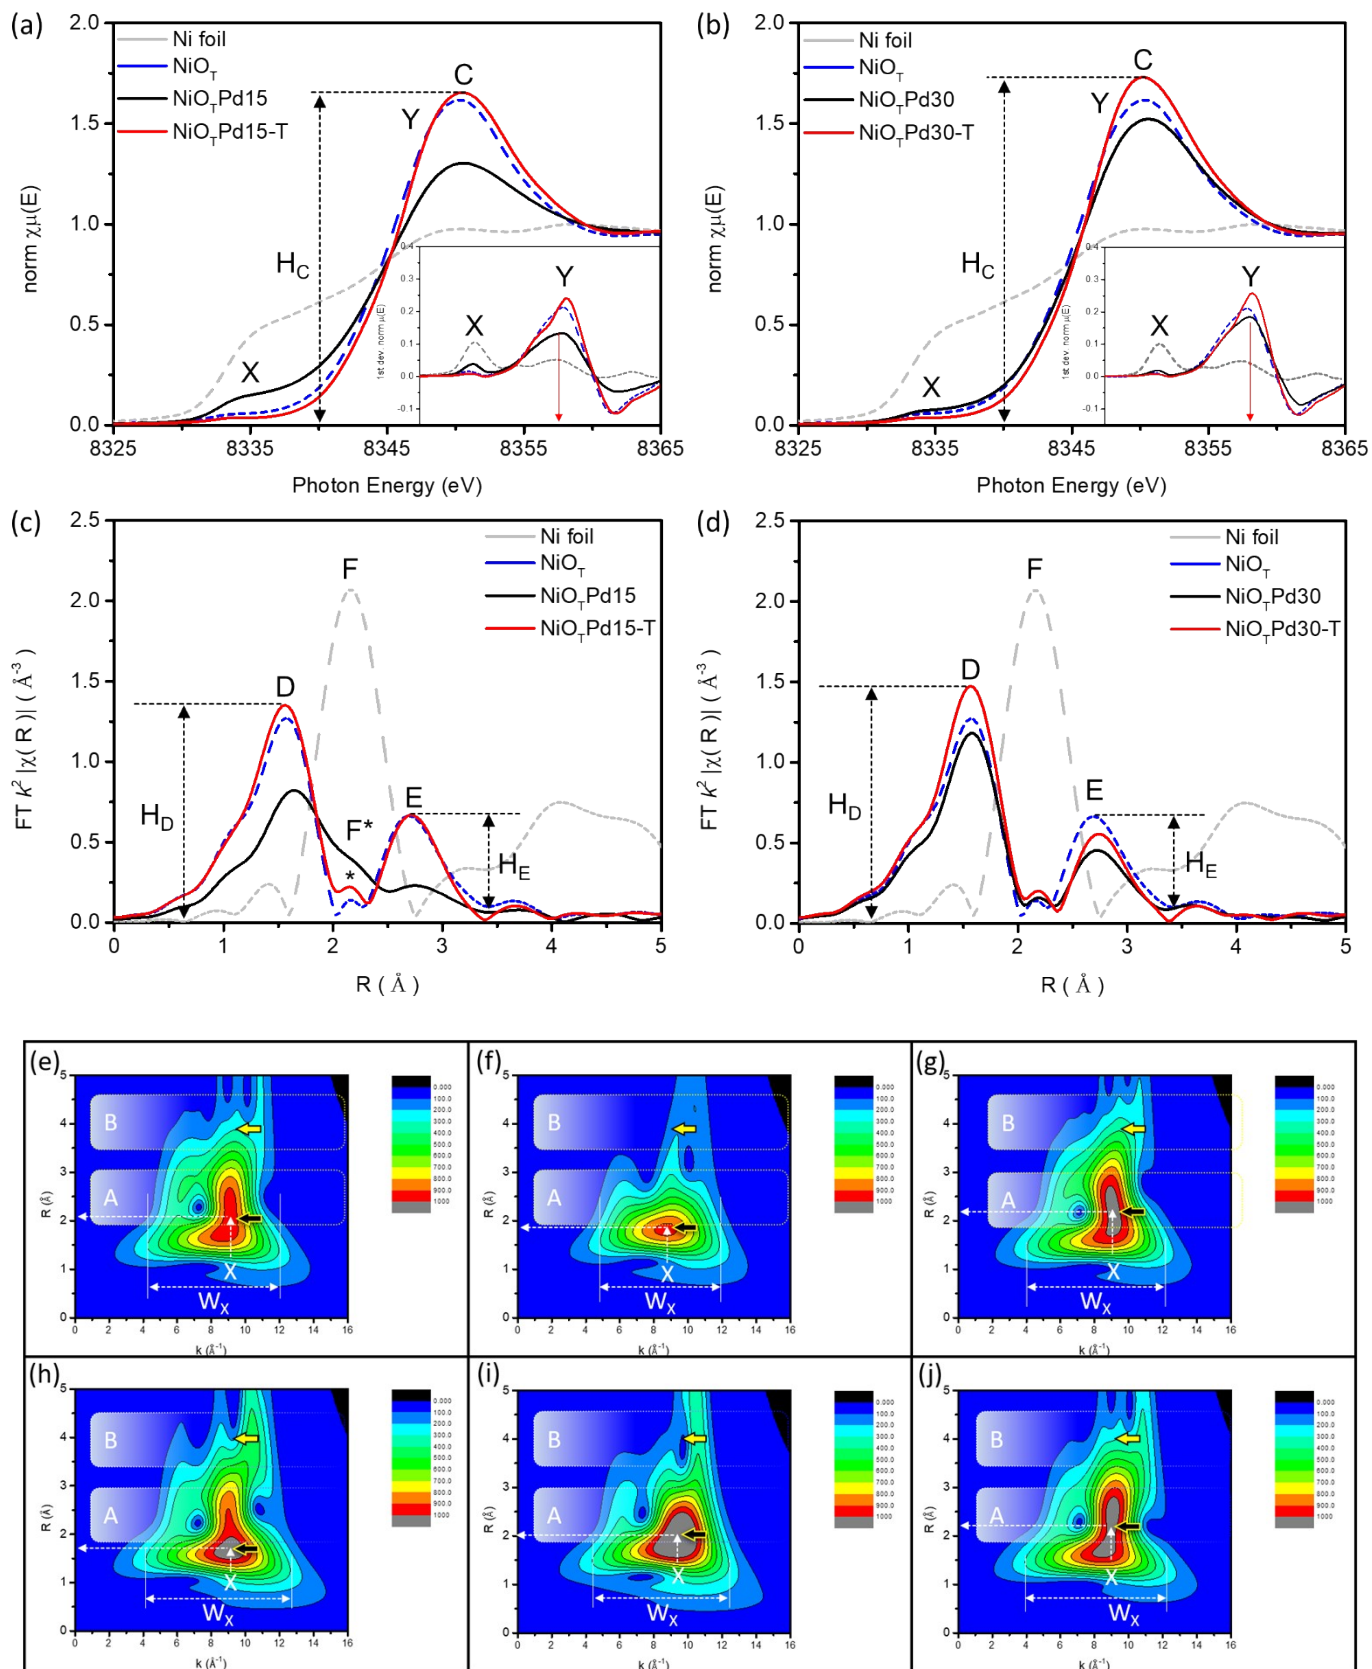

**Figure S6.** X-ray absorption near-edge structure (XANES) spectra of NiO<sub>T</sub>-T compared with (a) NiO<sub>T</sub>Pd15 (without TMOS capping) and NiO<sub>T</sub>Pd15-T and (b) NiO<sub>T</sub>Pd30 (without TMOS capping) and NiO<sub>T</sub>Pd30-T NCs at Ni K-edge. The corresponding Fourier transformed EXAFS spectra are demonstrated in (c) and (d) and the Wavelet transformed (WT) EXAFS patterns are shown in (e) for NiO<sub>T</sub>, (f) for NiO<sub>T</sub>Pd15, (g) for NiO<sub>T</sub>Pd15-T, (h) for NiO<sub>T</sub>-T, (i) for NiO<sub>T</sub>Pd30 and (j) for NiO<sub>T</sub>Pd30-T.

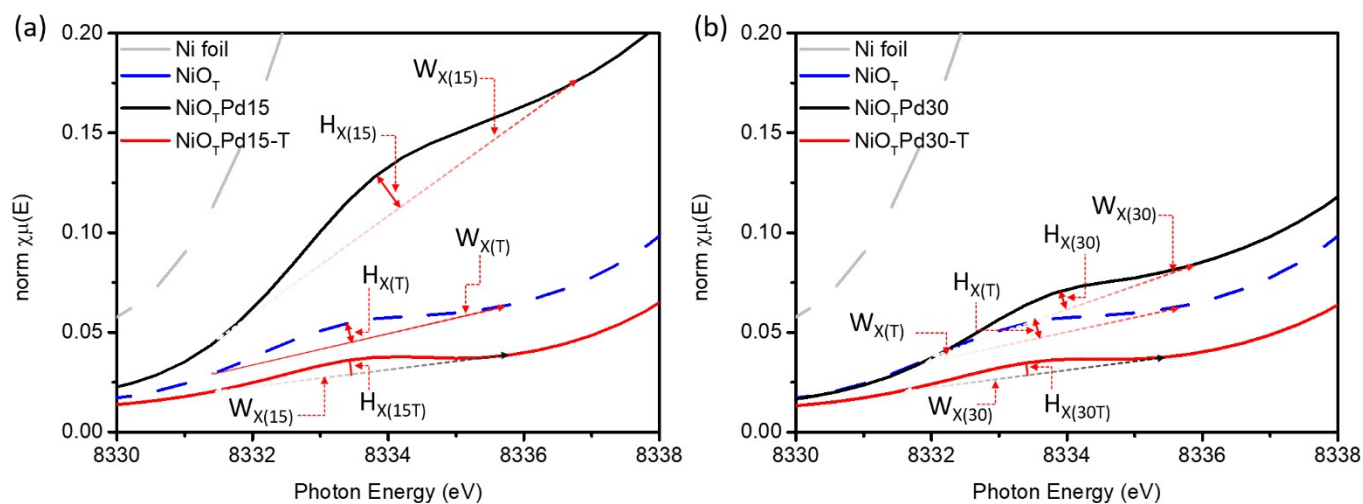

**Figure S7.** Zoom-in of pre-edge region of Ni K-edge XANES spectra for (a) NiO<sub>T</sub>Pd15-T and (b) NiO<sub>T</sub>Pd30-T with the control samples without TMOS and reference sample of NiO<sub>T</sub>.

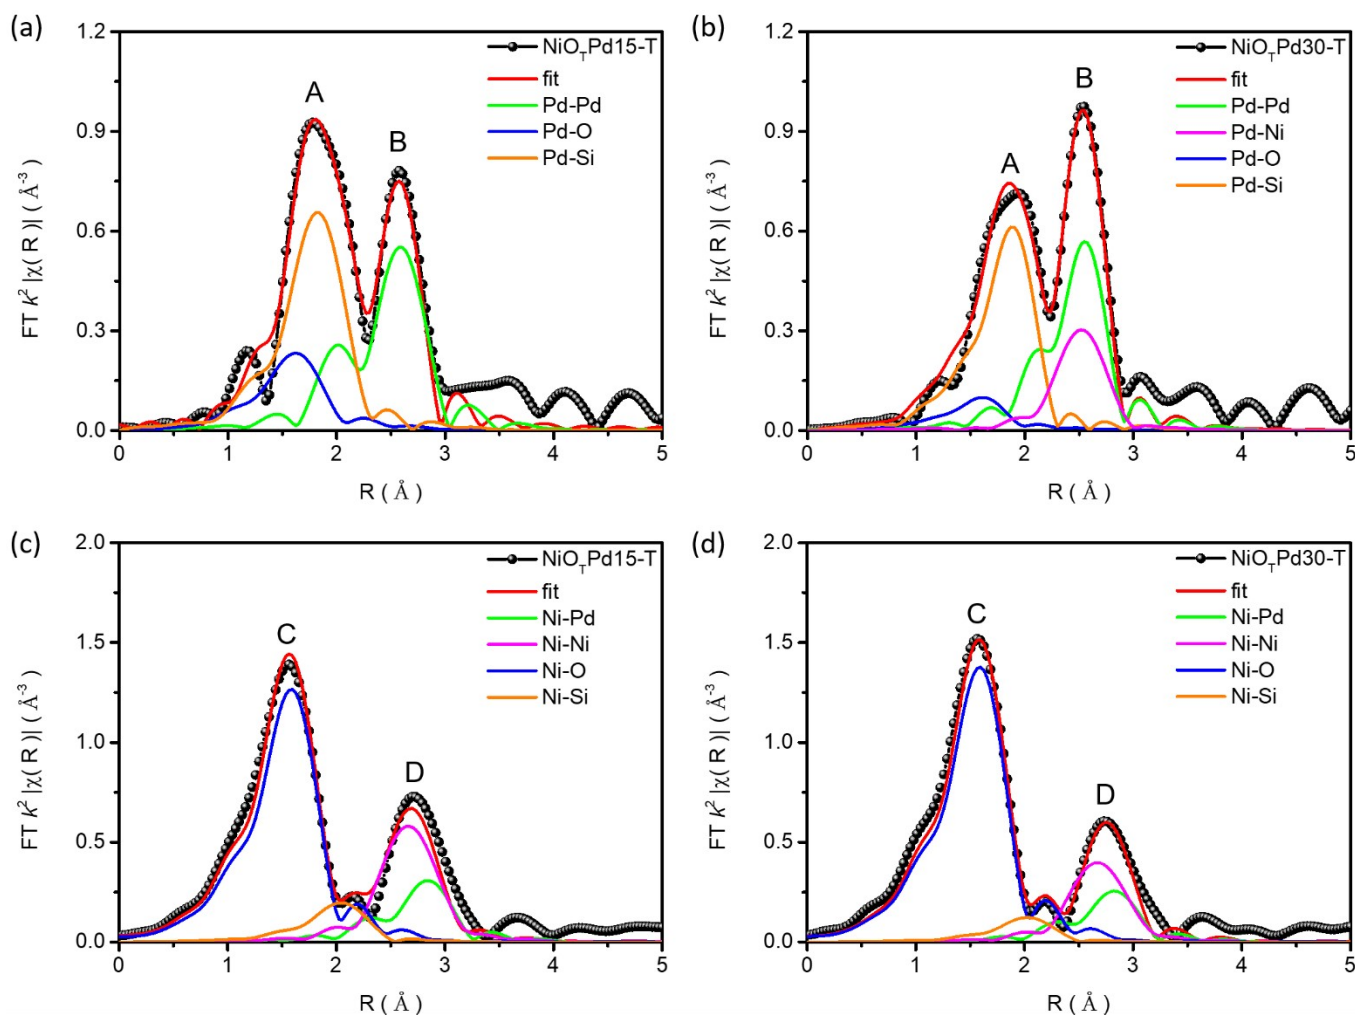

**Figure S8.** The Fourier transformed EXAFS spectra and corresponding model fitting curves of NiO<sub>T</sub>Pd15-T and NiO<sub>T</sub>Pd30-T at Pd and Ni K-edges.

**Table S2.** The qualitative characteristics of the XANES spectra for the reference sample (Pd-CNT), control samples (NiO<sub>T</sub>Pd15 and NiO<sub>T</sub>Pd30) and experimental samples (NiO<sub>T</sub>Pd15-T and NiO<sub>T</sub>Pd30-T) at Pd K-edge.

| Absorption edge | Sample | NiO <sub>T</sub> | NiO <sub>T</sub> -T | Pd-CNT | NiO <sub>T</sub> Pd15 | NiO <sub>T</sub> Pd15-T | NiO <sub>T</sub> Pd30 | NiO <sub>T</sub> Pd30-T |
|-----------------|--------|------------------|---------------------|--------|-----------------------|-------------------------|-----------------------|-------------------------|
| Pd K-edge       | X (eV) |                  |                     | 24350  | 24349.5               | 24353.5                 | 24349.5               | 24353.5                 |
|                 | ΔHMVN  |                  |                     | 0      | 0.053                 | 0.036                   | 0.045                 | 0.041                   |
|                 | ΔHVN   |                  |                     | 0.119  | 0.109                 | 0.051                   | 0.096                 | 0.063                   |
|                 | WMN    |                  |                     | 22.7   | 21.5                  | 20                      | 21.2                  | 20.5                    |
|                 | ΔHX    |                  |                     | 0      | 0                     | 0.01                    | 0                     | 0.006                   |
| Ni K-edge       | X (eV) | 8332.2           | 8332.2              |        | 8332.8                | 8332.8                  | 8332.8                | 8332.8                  |
|                 | Y (eV) | 8346             | 8346.3              |        | 8345.7                | 8346.5                  | 8346.3                | 8346.5                  |
|                 | HC     | 1.61             | 1.611               |        | 1.305                 | 1.658                   | 1.525                 | 1.731                   |
|                 | HX/WX  | 0.06             | 0.07                |        | 0.11                  | 0.06                    | 0.08                  | 0.04                    |

**Table S3.** EXAFS determined structural parameters of monometallic reference samples (Pd powder, Pd-CNT, Pd-T, Ni foil, NiO<sub>T</sub> and NiO<sub>T</sub>-T), control samples (NiO<sub>T</sub>Pd15 and NiO<sub>T</sub>Pd30) and experimental samples (NiO<sub>T</sub>Pd15-T and NiO<sub>T</sub>Pd30-T) at from model analysis on the corresponding EXAFS spectra Pd K-edge and Ni K-edges.

| Absorption Edge | Sample       | CN                      |       |       |       | $\chi$ (%) |      | R (Å) |       |       |       |       |
|-----------------|--------------|-------------------------|-------|-------|-------|------------|------|-------|-------|-------|-------|-------|
|                 |              | Pd-O                    | Pd-Si | Pd-Pd | Pd-Ni | Si         | Ni   | Pd-O  | Pd-Si | Pd-Pd | Pd-Ni |       |
| Pd K-edge       | Reference    | Pd powder               | 0     |       | 11.9  |            |      |       |       | 2.742 |       |       |
|                 |              | Pd-CNT                  | 0.55  |       | 7.45  |            |      | 2.057 |       | 2.741 |       |       |
|                 |              | Pd-T                    | 0.77  |       | 5.92  |            |      | 1.995 |       | 2.744 |       |       |
|                 | Control      | NiO <sub>T</sub> Pd15   | 0.77  |       | 5.34  | 0.37       | 0    | 5.6   | 2.042 |       | 2.749 | 2.802 |
|                 |              | NiO <sub>T</sub> Pd30   | 0.94  |       | 5.91  | 0.35       | 0    | 6.5   | 2.051 |       | 2.749 | 2.804 |
|                 | Experimental | NiO <sub>T</sub> Pd15-T | 0     | 2.89  | 2.47  | 0.95       | 45.8 | 15.1  | 2.141 | 2.368 | 2.788 | 2.864 |
|                 |              | NiO <sub>T</sub> Pd30-T | 0     | 2.14  | 2.98  | 0.81       | 36.1 | 13.7  |       | 2.365 | 2.766 | 2.842 |

| Absorption Edge | Sample       | CN                      |       |                    |       |       |        | R (Å) |       |                    |       |       |       |
|-----------------|--------------|-------------------------|-------|--------------------|-------|-------|--------|-------|-------|--------------------|-------|-------|-------|
|                 |              | Ni-O1                   | Ni-O* | Ni-Ni <sup>0</sup> | Ni-Si | Ni-O2 | Ni-Ni2 | Ni-O1 | Ni-O* | Ni-Ni <sup>0</sup> | Ni-Si | Ni-O2 |       |
| Ni K-edge       | Reference    | Ni foil                 |       |                    |       |       | 11.9   |       |       |                    |       |       |       |
|                 |              | NiOT                    | 5.12  |                    |       |       | 2.63   | 2.42  | 2.046 |                    |       |       | 2.959 |
|                 |              | NiO <sub>T</sub> -T     | 5.64  |                    |       |       | 1.57   | 2.56  | 2.045 |                    |       |       | 2.902 |
|                 | Control      | NiO <sub>T</sub> Pd15   | 3.44  | 1.4                | 0.78  |       | 0      | 0.84  | 2.136 | 2.435              | 2.522 |       | 0     |
|                 |              | NiO <sub>T</sub> Pd30   | 4.78  |                    |       |       | 2.08   | 1.61  | 2.042 |                    |       |       | 2.956 |
|                 | Experimental | NiO <sub>T</sub> Pd15-T | 5.52  |                    |       | 0.69  | 2.14   | 2.97  | 2.037 |                    |       | 2.465 | 2.899 |
|                 |              | NiO <sub>T</sub> Pd30-T | 5.98  |                    |       | 0.44  | 1.67   | 2.51  | 2.042 |                    |       | 2.449 | 2.898 |



**Table S4.** Calibrated product concentration of CO and CH<sub>4</sub> under 0.11 mbar CO<sub>2</sub> and mixing (CO<sub>2</sub>+H<sub>2</sub>) atmospheres from 323 K to 573 K for 12 mg of experimental samples (NiO<sub>T</sub>Pd15-T and NiO<sub>T</sub>Pd30-T) and reference samples (NiO<sub>T</sub>-T and Pd-T). The unit of concentration is μmol/g<sub>catalyst</sub>.

| Feeding gas |     | CO <sub>2</sub>     |                 |      |                 |                         |                 |                         |                 |
|-------------|-----|---------------------|-----------------|------|-----------------|-------------------------|-----------------|-------------------------|-----------------|
| Sample      |     | NiO <sub>T</sub> -T |                 | Pd-T |                 | NiO <sub>T</sub> Pd15-T |                 | NiO <sub>T</sub> Pd30-T |                 |
| Products    |     | CO                  | CH <sub>4</sub> | CO   | CH <sub>4</sub> | CO                      | CH <sub>4</sub> | CO                      | CH <sub>4</sub> |
| Temp.       | 323 | N/A                 | N/A             | N/A  | N/A             | N/A                     | 0.2             | N/A                     | N/A             |
|             | 373 |                     |                 |      |                 |                         | 0.9             |                         |                 |
|             | 423 |                     |                 |      |                 |                         | 1.5             |                         |                 |
|             | 473 |                     |                 | 33.7 | 0.6             | 73.2                    | 1.9             | 20.2                    | 2.4             |
|             | 523 |                     |                 | 54.8 | 0.8             | 334                     | 3.3             | 356                     | 3.9             |
|             | 573 |                     |                 | 11.8 | 87.5            | 1.5                     | 853             | 2.7                     | 860             |

| Feeding gas |     | CO <sub>2</sub> + 3H <sub>2</sub> |                 |      |                 |                         |                 |                         |                 |        |        |
|-------------|-----|-----------------------------------|-----------------|------|-----------------|-------------------------|-----------------|-------------------------|-----------------|--------|--------|
| Sample      |     | NiO <sub>T</sub> -T               |                 | Pd-T |                 | NiO <sub>T</sub> Pd15-T |                 | NiO <sub>T</sub> Pd30-T |                 |        |        |
| Products    |     | CO                                | CH <sub>4</sub> | CO   | CH <sub>4</sub> | CO                      | CH <sub>4</sub> | CO                      | CH <sub>4</sub> |        |        |
| Temp.       | 323 | N/A                               | N/A             | N/A  | N/A             | N/A                     | 0.5             | N/A                     | 0.6             |        |        |
|             | 373 |                                   |                 |      |                 |                         | 4.1             |                         | 4.7             |        |        |
|             | 423 |                                   |                 |      |                 |                         | 18.3            |                         | 23.3            |        |        |
|             | 473 |                                   | 7.1             |      | 12.3            | 86.5                    | 241.5           | 110.3                   | 287.3           | 100.3  |        |
|             | 523 |                                   | 245.3           |      | 187.7           | 147.3                   | 27.2            | 1208.2                  | 530.6           | 1189.8 | 537.5  |
|             | 573 |                                   | 2272.3          |      | 1083.2          | 636.8                   | 92.2            | 3629.5                  | 1905.1          | 2993.6 | 1727.9 |

#### 4. Ambient Pressure X-ray Photoemission Spectroscopy (APXPS) results for the experimental

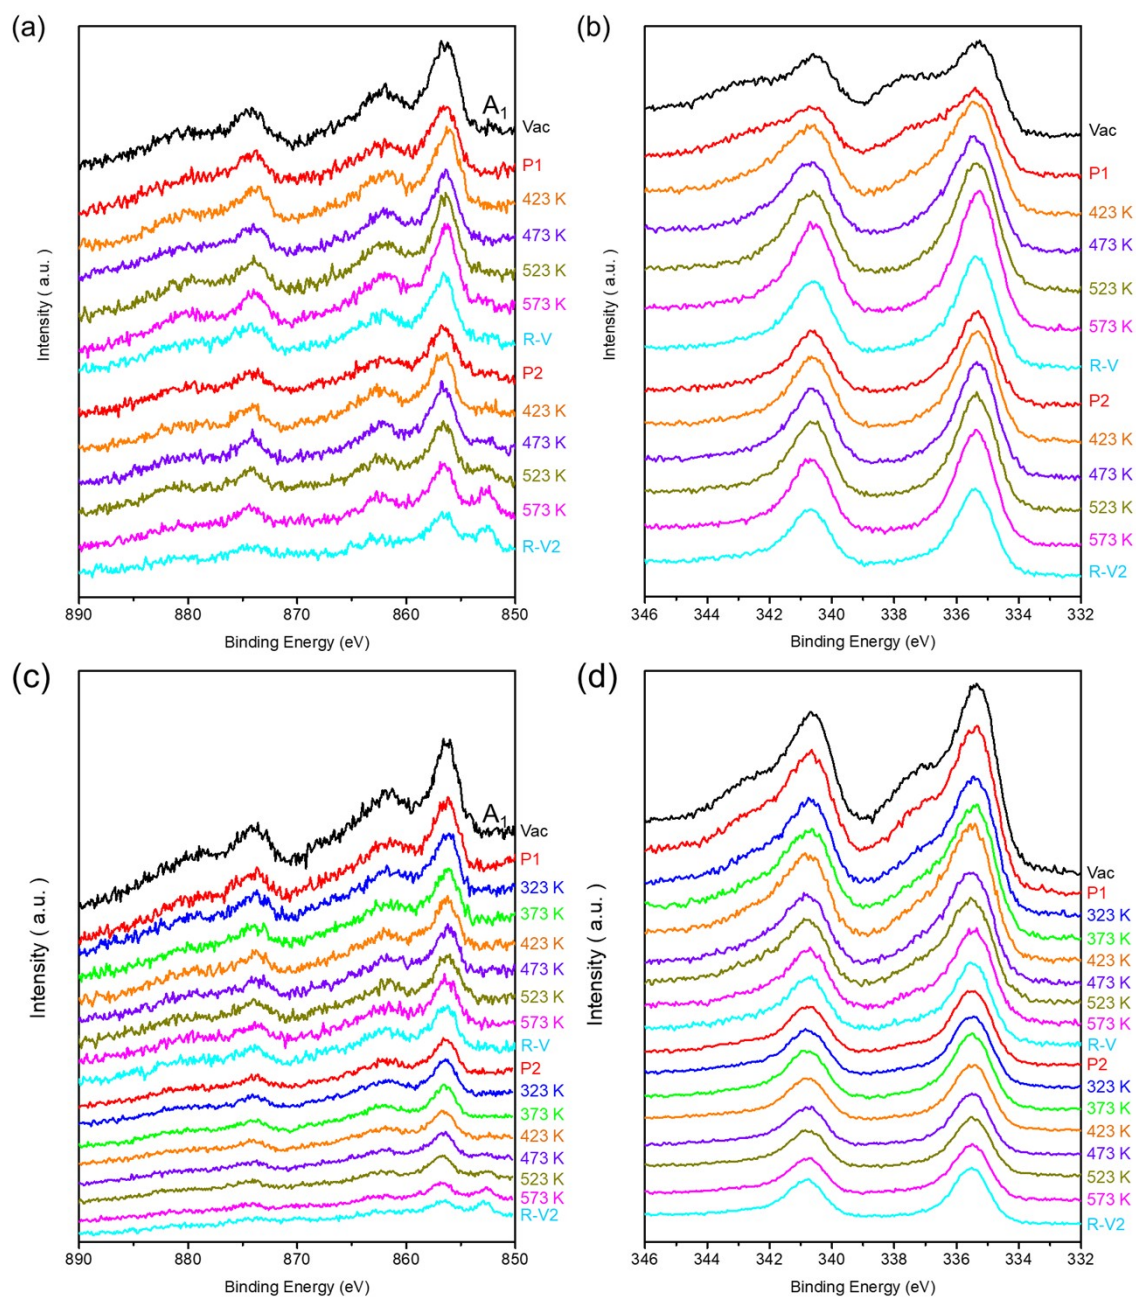

**Figure S9.** In-situ APXPS for NiO<sub>T</sub>Pd15-T NC at (a) Ni-2p and (b) Pd-3d orbitals and for NiO<sub>T</sub>Pd30-T NC at (c) Ni-2p and (d) Pd-3d orbitals. It operated at the initial state (**Vac**), under 0.11 mbar CO<sub>2</sub> (**P1**) and mixing gas (CO<sub>2</sub> and H<sub>2</sub>, **P2**) from 323 to 573 K. **R-V** denotes back to room temperature (RT) and vacuum. (e) Corresponding Ni relative surface concentrations in the progress of CO<sub>2</sub>RR with experimental samples (NiO<sub>T</sub>Pd15-T and NiO<sub>T</sub>Pd30-T).

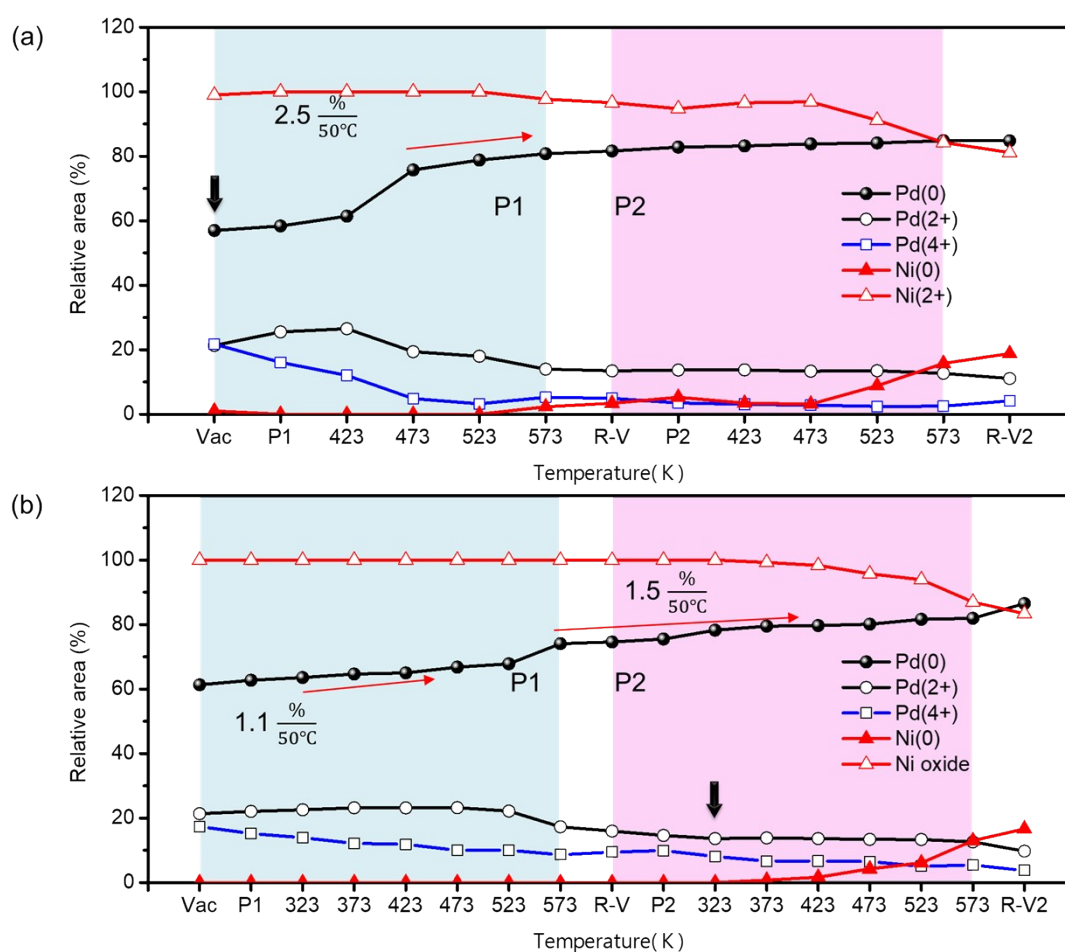

**Figure S10.** The variation of relative peak area between metallic Pd/Ni (solid) and metal oxide (hollow) in APXPS spectra and the corresponding schematic representation of reaction pathways for (a) NiO<sub>T</sub>Pd15-T and (b) NiO<sub>T</sub>Pd30-T NC. In-situ APXPS operated at 0.11 mbar ambient CO<sub>2</sub> (P1) and mixing gas (CO<sub>2</sub> and H<sub>2</sub>, P2) from RT to 573 K.

**Table S5.** The changes of CO and CH<sub>4</sub> production yields with the ambient conditions are compared with that of the Ni and Pd chemical states in NiO<sub>T</sub>Pd15-T.

| State | Ni metal (%) | Ni oxide (%) | Pd metal (%) | Pd <sup>2+</sup> (%) | Pd <sup>4+</sup> (%) | CO     | CH <sub>4</sub> |
|-------|--------------|--------------|--------------|----------------------|----------------------|--------|-----------------|
| Vac   | 1.01         | 98.99        | 56.96        | 21.30                | 21.74                |        | 0.2             |
| P1    | 0            | 100          | 58.36        | 25.54                | 16.1                 | N/A    | 0.9             |
| 423   | 0            | 100          | 61.42        | 26.52                | 12.06                |        | 1.5             |
| 473   | 0            | 100          | 75.75        | 19.4                 | 4.85                 | 73.2   | 1.9             |
| 523   | 0            | 100          | 78.8         | 17.98                | 3.22                 | 334.4  | 3.3             |
| 573   | 2.31         | 97.69        | 80.79        | 13.96                | 5.26                 | 852.6  | 2.7             |
| R-V   | 3.39         | 96.61        | 81.62        | 13.46                | 4.92                 |        |                 |
| P2    | 5.27         | 94.73        | 82.8         | 13.68                | 3.52                 |        |                 |
| 323   |              |              |              |                      |                      | N/A    | 0.5             |
| 373   |              |              |              |                      |                      |        | 4.1             |
| 423   | 3.45         | 96.55        | 83.19        | 13.72                | 3.09                 | 2.8    | 18.3            |
| 473   | 3.13         | 96.87        | 83.84        | 13.36                | 2.8                  | 241.5  | 110.3           |
| 523   | 8.84         | 91.16        | 84.1         | 13.5                 | 2.41                 | 1208.2 | 530.6           |
| 573   | 15.78        | 84.22        | 84.82        | 12.69                | 2.49                 | 3629.5 | 1905.1          |
| R-V2  | 18.82        | 81.18        | 84.76        | 11.05                | 4.19                 |        |                 |

**Table S6.** The changes of CO and CH<sub>4</sub> production yields with the ambient conditions are compared with that of the Ni and Pd chemical states in NiO<sub>7</sub>Pd<sub>30</sub>-T.

| State | Ni metal (%) | Ni oxide (%) | Pd metal (%) | Pd <sup>2+</sup> (%) | Pd <sup>4+</sup> (%) | CO     | CH <sub>4</sub> |
|-------|--------------|--------------|--------------|----------------------|----------------------|--------|-----------------|
| Vac   | 0            | 100          | 61.31        | 21.35                | 17.35                |        |                 |
| P1    | 0            | 100          | 62.73        | 22.06                | 15.2                 |        | N/A             |
| 323   | 0            | 100          | 63.58        | 22.53                | 13.89                | N/A    |                 |
| 373   | 0            | 100          | 64.66        | 23.19                | 12.14                |        |                 |
| 423   | 0            | 100          | 65.01        | 23.13                | 11.87                |        | 2.0             |
| 473   | 0            | 100          | 66.78        | 23.23                | 9.99                 | 20.2   | 2.4             |
| 523   | 0            | 100          | 67.83        | 22.16                | 10.01                | 356.0  | 3.9             |
| 573   | 0            | 100          | 74.07        | 17.28                | 8.65                 | 860.0  | 2.7             |
| R-V   | 0            | 100          | 74.59        | 15.96                | 9.45                 |        |                 |
| P2    | 0            | 100          | 75.49        | 14.6                 | 9.91                 |        |                 |
| 323   | 0            | 100          | 78.24        | 13.64                | 8.12                 |        | 0.6             |
| 373   | 0.75         | 99.25        | 79.52        | 13.84                | 6.65                 |        | 4.7             |
| 423   | 1.66         | 98.34        | 79.68        | 13.64                | 6.68                 |        | 23.3            |
| 473   | 4.26         | 95.74        | 80.11        | 13.39                | 6.5                  | 287.3  | 100.3           |
| 523   | 6.11         | 93.89        | 81.6         | 13.34                | 5.05                 | 1189.8 | 537.5           |
| 573   | 12.99        | 87.01        | 81.94        | 12.61                | 5.42                 | 2993.6 | 1727.9          |
| R-V2  | 16.63        | 83.37        | 86.5         | 9.74                 | 3.76                 |        |                 |
